# Supplementary material for: Seasonal variability and sources of in situ brGDGT production in a permanently stratified African crater lake
Source: Copernicus journal article supplement (doi:10.5194/bg-2020-233), 2020-07-28
Supplement: Supplementary file 1 [file BrGDGTs-Supplementary tables.xlsx]

## Sheet: Info
Supplementary tables
Table S.1: Concentration of brGDGTs in SPM (in ng L-1).
Table S.2: Concentration of brGDGTs in settling particles (in ng m-2 L-1).
Table S.3: Fractional abundance of brGDGTs in catchment soils.
Table S.4: Fractional abundance of brGDGTs in surficial lake-bottom sediment.
Table S.5: Relative abundance of 16S rRNA gene copies (in %) up to taxonomic
level L3 obtained by the 16S rRNA gene amplicon sequencing and quantitative
PCR for all Acidobacteria SDs and the 12 additional bacterial species that are
included in Fig. 8.

## Sheet: S.1 brGDGTs SPM
S1								brGDGT concentration in SPM (ng L-1)
month	Sampling date	Month represented in text	Depth	DO	TEMP	COND	pH	Ia	Ib	Ic	IIa	IIa'	IIb	IIb'	IIc	IIc'	IIIa	IIIa'	IIIb	IIIb'	IIIc	IIIc'
A-0	2013-09-07	2013-09-01	0	9.5	23.5	373	8.74	0.10173	0.0282106	0.0040336	0.0204921	0.121023	0.00886854	0.0295304	0	0	0.00494016	0.0343089	0	0	0	0
A-10	2013-09-07	2013-09-01	10	5.02	22.83	379	8.33	0.0985889	0.03543	0	0.0247729	0.176974	0.0120496	0.0403947	0	0	0	0.0629846	0	0	0	0
A-25	2013-09-07	2013-09-01	25	0	22.61	385	7.665	0.172539	0.0553024	0	0	0.319268	0	0.0793554	0	0	0	0.105342	0	0	0	0
A-35	2013-09-07	2013-09-01	35	0	22.605	382.618	7.62	0.118688	0.0373066	0.00267998	0.0280117	0.239843	0.013354	0.0561587	0	0	0.00749854	0.0742127	0	0.00673441	0	0
A-50	2013-09-07	2013-09-01	50	0	22.59	386	7.6	0.0867814	0	0	0	0.154146	0	0	0	0	0	0.0665364	0	0	0	0
A-80	2013-09-07	2013-09-01	80	0				0.748419	0.244994	0	0.186923	2.1666	0.0462372	0.49897	0	0	0.0781132	1.01319	0	0.0549395	0	0
B-0	2013-09-30	2013-10-01	0	7.59	24.82	370	8.86	0.143449	0.0331423	0.0052104	0.014883	0.132802	0.0072316	0.0321255	0	0	0.00384589	0.025058	0	0.00219376	0	0
B-10	2013-09-30	2013-10-01	10	5.6	22.98	376	8.45	0.0818402	0.031968	0	0.0220399	0.11529	0	0.0374159	0	0	0	0.0404317	0	0	0	0
B-25	2013-09-30	2013-10-01	25	0	22.61	384	7.71	0.0833912	0	0	0	0.149023	0	0	0	0	0	0.0442754	0	0	0	0
B-35	2013-09-30	2013-10-01	35	0	22.6	382.375	7.69	0.16339	0.0412412	0.00269042	0.0317826	0.304742	0.0151692	0.0499627	0	0	0.00762032	0.0886996	0	0.00424034	0	0
B-50	2013-09-30	2013-10-01	50	0	22.59	385	7.66	0.376062	0.0927931	0	0.0788434	0.889045	0.041502	0.112628	0	0	0	0.306085	0	0	0	0
B-60	2013-09-30	2013-10-01	60	0				0.445122	0.108106	0.0625641	0.13042	0.922717	0.057562	0.170655	0	0	0.0226184	0.294142	0	0.0294481	0	0
B-70	2013-09-30	2013-10-01	70	0				1.32006	0.447714	0.0247491	0.395965	3.98503	0.178004	0.799028	0	0	0.0931108	1.47213	0.0109554	0.103874	0	0
B-80	2013-09-30	2013-10-01	80	0				0.461825	0.152362	0	0.1261	1.52374	0.0403503	0.320792	0	0	0.0499984	0.768987	0	0.0441646	0	0
C-0	2013-11-02	2013-11-01	0	7.24	25.96	376	8.97	0.243747	0.0894626	0	0.0479026	0.229634	0	0.0868187	0	0	0	0.0554301	0	0	0	0
C-10	2013-11-02	2013-11-01	10	7.24	24.6	372	8.85	0.179013	0.0671892	0	0.0509725	0.189032	0	0.0721848	0	0	0	0.0490563	0	0	0	0
C-20	2013-11-02	2013-11-01	20	0	22.64	386	7.87	0.512323	0.207115	0	0.128789	0.90163	0.189808	0.105281	0	0	0	0.228666	0	0	0	0
C-25	2013-11-02	2013-11-01	25	0	22.61	385	7.88	0.558647	0.245672	0.0252719	0.166488	0.790078	0.231992	0.110506	0	0	0.0309881	0.212216	0	0	0	0
C-25	2013-11-02	2013-11-01	25	0	22.61	385	7.88	0.558647	0.245672	0.0252719	0.166488	0.790078	0.231992	0.110506	0	0	0.0309881	0.212216	0	0	0	0
C-30	2013-11-02	2013-11-01	30	0	22.61	386	7.88	0.361311	0.1594	0	0.11139	0.650424	0.142612	0.0946629	0	0	0	0.179702	0	0	0	0
C-35	2013-11-02	2013-11-01	35	0	22.6	386	7.865	0.540344	0.287573	0	0.190046	0.911201	0.297822	0.111157	0	0	0.0269396	0.242681	0	0	0	0
C-40	2013-11-02	2013-11-01	40	0	22.59	386	7.86	0.400749	0.109392	0	0.0889235	0.936341	0.0701471	0.123543	0	0	0	0.261681	0	0	0	0
C-45	2013-11-02	2013-11-01	45	0	22.58	387.5	7.835	0.687441	0.435787	0	0.29717	1.12312	0.510439	0	0	0	0	0.275446	0	0	0	0
C-50	2013-11-02	2013-11-01	50	0	22.57	388	7.83	0.856296	0.627738	0	0.42056	1.19793	0.723182	0.176974	0	0	0	0.321462	0	0	0	0
C-60	2013-11-02	2013-11-01	60	0				0.971925	1.00348	0	0.67486	1.40654	1.25507	0.227926	0	0	0	0.418249	0	0	0	0
C-70	2013-11-02	2013-11-01	70	0				0	0.37359	0	0.455505	3.25223	0.172678	0.772744	0	0	0	1.24315	0	0	0	0
C-80	2013-11-02	2013-11-01	80	0				2.30707	0.49964	0	0.745889	4.53837	0	0.866975	0	0	0	1.64748	0	0	0	0
C-90	2013-11-02	2013-11-01	90	0				0.652295	0.186059	0	0.135888	1.0528	0.181242	0.118626	0	0	0	0.268509	0	0	0	0
D-0	2013-12-04	2013-12-01	0	7.35	26.48	375	8.99	0.188325	0.0305229	0.005003	0.0116946	0.236014	0.00556891	0.0291337	0	0.00266438	0.00331241	0.0411438	0	0.00191236	0	0
D-10	2013-12-04	2013-12-01	10	6.95	26.05	377	8.97	0.242526	0.0363994	0	0.0189298	0.342947	0	0.0410144	0	0	0	0.0769036	0	0	0	0
D-25	2013-12-04	2013-12-01	25	0	22.615	387	7.88	0.476749	0.403591	0.0432874	0.186262	0.679376	0.590604	0.0468956	0	0	0.0305723	0.16414	0	0	0	0
D-35	2013-12-04	2013-12-01	35	0	22.595	381.893	7.85	1.02824	0.879053	0.0844454	0.480565	1.6032	1.50697	0	0	0	0.0826954	0.389253	0.0305824	0.00778591	0	0
D-50	2013-12-04	2013-12-01	50	0	22.57	388	7.81	0.982219	1.14798	0.117599	0.589727	1.42764	1.63438	0.139696	0.0499621	0	0.129173	0.495295	0.0455241	0	0	0
D-60	2013-12-04	2013-12-01	60	0				0.831081	0.802146	0.12016	0.427453	1.40991	1.09827	0.242854	0	0	0.0702727	0.362245	0.024966	0.0262164	0	0
D-70	2013-12-04	2013-12-01	70	0				1.4222	0.528859	0.0442779	0.422493	4.23951	0.393956	0.789543	0	0	0.111366	1.36906	0.0162281	0.0953615	0	0
D-80	2013-12-04	2013-12-01	80	0				1.52977	0.355824	0	0.32746	2.92179	0.220545	0.462131	0	0	0.0986999	1.05038	0	0.0530268	0	0
E-0	2014-01-06	2014-01-01	0	6.38	25.78	372	8.91	0.229458	0.0485555	0.00870764	0.0187508	0.436151	0.0269932	0.0348688	0	0.00303219	0.00448023	0.111797	0	0.00202765	0	0
E-10	2014-01-06	2014-01-01	10	6.04	25.55	372	8.88	0.265899	0.0671631	0	0.0352558	0.546379	0.0379094	0.0662751	0	0	0	0.193829	0	0	0	0
E-25	2014-01-06	2014-01-01	25	0	22.715	389	7.82	0.352237	0.278433	0.0294466	0.134543	0.600136	0.405695	0.052734	0	0	0	0.175824	0	0	0	0
E-35	2014-01-06	2014-01-01	35	0	22.59	381.654	7.79	0.367266	0.109943	0.0121565	0.0398453	0.808145	0.133565	0.0524822	0	0	0.00971085	0.22789	0.00540336	0.00256862	0	0
E-50	2014-01-06	2014-01-01	50	0	22.55	388	7.75	0.474942	0.365791	0	0.188975	0.772982	0.546607	0.0963517	0	0	0	0.25144	0	0	0	0
E-60	2014-01-06	2014-01-01	60	0				1.48771	2.57397	0.28045	1.13418	1.7842	4.22096	4.2381	0	0	0.208984	0.53008	0.0979185	0.0375947	0	0
E-70	2014-01-06	2014-01-01	70	0				0.422554	0.347361	0.0414623	0.175455	0.787515	0.483892	0.0937445	0	0	0.0332897	0.220629	0.0116083	0.00887843	0	0
E-80	2014-01-06	2014-01-01	80	0				1.13575	0.27553	0	0.384976	2.63515	0.135993	0.477786	0	0	0.125225	1.12277	0	0.0631819	0	0
F-0	2014-02-03	2014-02-01	0	6.63	26.14	375	8.84	0.182026	0.0660122	0.0103891	0.0251077	0.312417	0.0474431	0.0422439	0.00216268	0.00400269	0.00574524	0.0857149	0	0.00267742	0	0
F-10	2014-02-03	2014-02-01	10	6.36	25.69	376	8.88	0.140269	0.0502978	0	0.0255006	0.228382	0.038076	0.0344108	0	0	0	0.0809128	0	0	0	0
F-25	2014-02-03	2014-02-01	25	0	22.905	390.5	7.765	0.34879	0.355165	0.0378321	0.186479	0.499155	0.514447	0.0579963	0.0164413	0	0.0334754	0.15111	0.0150419	0	0	0
F-35	2014-02-03	2014-02-01	35	0	22.59	381.125	7.705	0.617931	0.587437	0.0588409	0.469212	1.00153	1.50295	0	0	0	0.0758445	0.263692	0.0313183	0.00878683	0	0
F-50	2014-02-03	2014-02-01	50	0	22.55	392	7.65	0.343575	0.368243	0.0400286	0.200029	0.52233	0.566464	0.0717472	0	0	0.0403917	0.174232	0	0	0	0
F-60	2014-02-03	2014-02-01	60	0				0.649699	0.694948	0.075356	0.420282	1.22305	0.999785	0.221633	0	0	0.0922714	0.328512	0.0246132	0.0407839	0	0
F-80	2014-02-03	2014-02-01	80	0				3.87031	0.758236	0	0.78177	5.83871	0.533197	1.07963	0	0	0.251322	2.25037	0	0.136597	0	0
G-0	2014-03-06	2014-03-01	0	6.17	28.36	375	8.93	0.121322	0.046388	0.00660901	0.0132835	0.147862	0.0207625	0.0320324	0	0.00247223	0.00325686	0.0346333	0	0	0	0
G-10	2014-03-06	2014-03-01	10	6.22	26.14	370	8.94	0.170968	0.0591107	0	0.0303778	0.211245	0.0705311	0	0	0	0	0.0711855	0	0	0	0
G-25	2014-03-06	2014-03-01	25	0	22.86	386.5	7.81	0.309128	0.291225	0.0297053	0.136267	0.388573	0.456853	0	0	0	0.0239983	0.101828	0	0	0	0
G-35	2014-03-06	2014-03-01	35	0	22.585	380.409	7.72	1.63793	1.39799	0.127478	0.725446	1.87617	2.29387	0	0	0	0.157109	0.390824	0.0433156	0.0342846	0	0
G-50	2014-03-06	2014-03-01	50	0	22.56	387	7.68	1.56876	1.47292	0.146311	0.778028	2.00264	2.18066	0.168228	0.0705209	0	0.208506	0.632387	0.0621473	0.0458243	0	0
G-60	2014-03-06	2014-03-01	60	0				2.02229	2.39757	0.396562	1.38477	3.58886	3.58617	0.62377	0	0	0.337097	1.06358	0.0883019	0.200569	0	0
G-70	2014-03-06	2014-03-01	70	0				0.805758	0.626211	0.0692352	0.455078	1.72459	0.825197	0.28025	0	0	0.1048	0.535693	0.0239063	0.0535663	0	0
G-80	2014-03-06	2014-03-01	80	0				1.8934	0.464828	0.033966	0.453275	3.25244	0.365443	0.587653	0	0	0.162114	1.33381	0	0.0885	0	0
H-0	2014-04-04	2014-04-01	0	6.39	27.41	375	8.96	0.0949787	0.0386756	0.00580017	0.0116182	0.119381	0.0170756	0.0265381	0	0.00210581	0.00272499	0.0259681	0	0.00149108	0	0
H-10	2014-04-04	2014-04-01	10	6.25	27.03	375	8.97	0.129933	0.0486767	0	0.0275046	0.163097	0.0257193	0.0383393	0	0	0.0124494	0.0546875	0	0	0	0
H-25	2014-04-04	2014-04-01	25	0	23.415	397.5	7.82	0.540405	0.128049	0	0.0700765	1.15502	0.0768782	0.147365	0	0	0	0.377752	0	0	0	0
H-35	2014-04-04	2014-04-01	35	0	22.575	379.9	7.725	0.861019	0.70627	0.0683951	0.405516	1.13044	1.00775	0.191438	0	0	0.0957415	0.296852	0.026291	0.0376507	0	0
H-50	2014-04-04	2014-04-01	50	0	22.54	387	7.68	1.05763	0.830317	0	0.445359	1.50724	1.09168	0	0	0	0	0.540959	0	0	0	0
H-60	2014-04-04	2014-04-01	60	0				3.34325	3.41771	0.368076	2.43974	6.05582	4.84026	1.2282	0	0	0.591982	1.78168	0.13314	0.220412	0	0
H-70	2014-04-04	2014-04-01	70	0				1.28159	0.775306	0.0731126	0.566658	2.6477	0.924668	0.532293	0	0	0.174505	0.908831	0.0274885	0.0799889	0	0
H-80	2014-04-04	2014-04-01	80	0				1.45778	0.587566	0	0.673184	3.0189	0.571574	0.492457	0	0	0.211107	1.17351	0	0.0806964	0	0
I-0	2014-05-01	2014-05-01	0	NA	27.62	373	8.95	0.144139	0.0575703	0.0090973	0.0143491	0.159309	0.0223338	0.0384924	0	0.00328898	0.00281487	0.0312257	0	0.0024341	0	0
I-10	2014-05-01	2014-05-01	10	NA	27.34	373	8.95	0.0973999	0.0371979	0	0.0154572	0.116112	0.0154843	0.0288574	0	0	0	0.0357398	0	0	0	0
I-25	2014-05-01	2014-05-01	25	0.775	23.5	384.5	7.96	0.738989	0.579116	0.0393744	0.466899	1.0362	0.600639	0.190653	0	0	0.0771405	0.363731	0	0.0370774	0	0
I-35	2014-05-01	2014-05-01	35	0	22.57	379.111	7.705	1.393	1.43549	0.12229	1.49495	1.84185	1.96561	0.415875	0	0	0.263353	0.535465	0.0491839	0.0986797	0	0
I-50	2014-05-01	2014-05-01	50	0	22.54	390	7.65	0.499002	0.645425	0.056717	0.702976	0.782793	0.7924	0	0	0	0.162033	0.315281	0	0.0403876	0	0
I-60	2014-05-01	2014-05-01	60	0				0.85062	0.864633	0.115658	0.714329	1.59461	1.2765	0.374387	0	0	0.147825	0.520471	0.0307604	0.0742856	0	0
I-70	2014-05-01	2014-05-01	70	0				0.955898	0.647723	0.0646708	0.576582	2.04038	0.849647	0.331976	0	0	0.130191	0.647066	0.0261313	0.0526875	0	0
I-80	2014-05-01	2014-05-01	80	0				1.23168	0.371768	0	0.376723	1.67121	0.361181	0	0	0	0	0.596438	0	0	0	0
J-0	2014-06-01	2014-06-01	0	NA	25.57	370	8.77	0.207303	0.0656388	0.00779716	0.0238304	0.264196	0.0244643	0.0411791	0	0.00328818	0.00403262	0.0488916	0	0.00228681	0	0
J-10	2014-06-01	2014-06-01	10	NA	25.52	370	8.74	0.172565	0.0584841	0	0	0.23346	0	0	0	0	0	0.0687528	0	0	0	0
J-25	2014-06-01	2014-06-01	25	3.515	25.4	379	8.52	0.214348	0.0595845	0	0.0287623	0.294081	0.0261871	0.0456866	0	0	0	0.0536641	0	0	0	0
J-35	2014-06-01	2014-06-01	35	0	22.59	378.125	7.645	0.584949	0.366392	0.0346746	0.322515	0.780064	0.472457	0.14875	0	0	0.0545308	0.190858	0.0144434	0.0283046	0	0
J-50	2014-06-01	2014-06-01	50	0	22.54	387	7.61	1.22064	1.18329	0.113191	0.979466	1.64337	1.55726	0.275647	0.0525319	0	0.229795	0.540416	0.0503071	0.0435746	0	0
J-60	2014-06-01	2014-06-01	60	0				2.11059	1.63665	0.175331	1.82273	3.04086	2.30929	0.490957	0	0	0.350755	0.83761	0.0729631	0.120227	0	0
J-70	2014-06-01	2014-06-01	70	0				0.634263	0.528155	0.0567637	0.462266	1.12971	0.655172	0.155373	0	0	0.0859506	0.335	0.0233214	0.0309592	0	0
J-80	2014-06-01	2014-06-01	80	0				0.974843	0.413507	0	0.448984	1.9648	0.387649	0.34563	0	0	0.155301	0.807223	0	0	0	0
K-0	2014-06-30	2014-07-01	0	NA	24.29	378	8.77	0.142886	0.0683546	0.00851827	0.0503353	0.148764	0.0341618	0.0438019	0	0.0025187	0.00795276	0.0367527	0	0.00493794	0	0
K-10	2014-06-30	2014-07-01	10	NA	24.05	377	8.72	0.193982	0.0817291	0	0.074333	0.209198	0.0437157	0.0599608	0	0	0	0.0659709	0	0	0	0
K-25	2014-06-30	2014-07-01	25	NA	24.02	377.5	8.665	0.163751	0.0662066	0	0.0659901	0.18886	0	0	0	0	0	0	0	0	0	0
K-35	2014-06-30	2014-07-01	35	0	22.585	376.571	7.705	0.788457	0.651226	0.0563222	0.791476	1.10594	0.903822	0.269302	0	0	0.122399	0.355458	0.0232443	0.0831792	0	0
K-50	2014-06-30	2014-07-01	50	0	22.52	392	7.61	0.866058	0.865306	0.0866144	0.883244	1.22307	1.212	0.201463	0	0	0.215549	0.501374	0	0.0551354	0	0
K-60	2014-06-30	2014-07-01	60	0				0.836195	0.650191	0.0814143	0.716127	1.29038	0.925378	0.158808	0	0	0.151087	0.391453	0.0211536	0.0550707	0	0
K-70	2014-06-30	2014-07-01	70	0				0.606615	0.475048	0.0515966	0.493121	1.12109	0.618545	0.175505	0	0	0.114382	0.358324	0.0179422	0.0410248	0	0
K-80	2014-06-30	2014-07-01	80	0				0.40687	0.209544	0	0.220758	0.56923	0.230316	0.109622	0	0	0	0.202835	0	0	0	0
L-0	2014-07-31	2014-08-01	0	7.14	23.51	375	8.88	0.165377	0.0957196	0	0.124483	0.195568	0.065579	0.0590815	0	0	0	0.0562178	0	0	0	0
L-10	2014-07-31	2014-08-01	10	6.69	23.03	375	8.84	0.12954	0.077055	0	0.104858	0.165977	0.0587344	0.0515008	0	0	0	0.0454184	0	0	0	0
L-20	2014-07-31	2014-08-01	20	6.64	23.03	374	8.84	0.469251	0.185224	0	0.226835	0.499149	0.114384	0.113328	0	0	0.0478647	0.145232	0	0	0	0
L-25	2014-07-31	2014-08-01	25	6.47	23.03	375	8.825	0.185179	0.069829	0	0.0832765	0.246299	0.0496038	0.0593792	0	0	0.0167149	0.0607106	0	0	0	0
L-30	2014-07-31	2014-08-01	30	6.36	23.03	375	8.81	0.256571	0.113263	0	0.159477	0.278374	0.0905813	0.0704764	0	0	0.0267473	0.07607	0	0	0	0
L-35	2014-07-31	2014-08-01	35	5.915	22.78	375	8.755	0.487894	0.129016	0	0.174772	0.449576	0.102503	0.0872007	0	0	0.0293403	0.100783	0	0	0	0
L-40	2014-07-31	2014-08-01	40	0	22.75	386	7.85	0.404663	0.359732	0	0.457947	0.61471	0.495382	0.13322	0	0	0.0854932	0.182815	0	0	0	0
L-45	2014-07-31	2014-08-01	45	0	22.58	386.5	7.825	0.579132	0.459685	0	0.606207	0.811257	0.618901	0.118875	0	0	0.111767	0.247321	0	0	0	0
L-50	2014-07-31	2014-08-01	50	0	22.53	388	7.78	0.44364	0.316192	0	0.540281	0.974523	0.583552	0.354873	0	0	0.12574	0.270882	0	0	0	0
L-60	2014-07-31	2014-08-01	60	0				1.4828	1.02486	0	1.15449	2.26501	1.46168	0.347563	0	0	0.26042	0.668094	0	0	0	0
L-70	2014-07-31	2014-08-01	70	0				1.39261	0.877384	0	0.957236	2.9532	1.10011	0.580708	0	0	0.228183	0.938077	0	0.102118	0	0
L-80	2014-07-31	2014-08-01	80	0				1.21911	0.464269	0	0.665321	2.41852	0.449425	0.49504	0	0	0	0.845512	0	0	0	0
L-90	2014-07-31	2014-08-01	90	0				0.796146	0.679121	0.0700957	0.778637	1.39208	0.921797	0.255291	0.0334376	0	0.196971	0.522011	0.0319621	0.0491484	0	0
M-0	2014-08-31	2014-09-01	0	8.94	23.69	370	8.96	0.0659501	0.0318275	0.0036846	0.0259342	0.0523621	0.0157129	0.0227352	0	0	0.00432057	0.014458	0	0.00355259	0	0
M-10	2014-08-31	2014-09-01	10	8.71	23.51	370	8.95	0.0629332	0.0368902	0	0.0461981	0.0704038	0	0	0	0	0	0	0	0	0	0
M-25	2014-08-31	2014-09-01	25	5.64	22.79	374.6	8.57	0.269676	0.0868884	0	0.0873653	0.309046	0.050014	0.067577	0	0	0.0189334	0.0747242	0	0	0	0
M-35	2014-08-31	2014-09-01	35	4.76	22.775	373.8	8.45	0.453045	0.0954787	0.00878087	0.0843002	0.427438	0.0473403	0.0864798	0	0	0.0136332	0.0709524	0.00261165	0.00682617	0	0
M-50	2014-08-31	2014-09-01	50	0	22.53	390	7.58	0.280745	0.175305	0	0.257354	0.332494	0.176192	0	0	0	0	0.128739	0	0	0	0
M-60	2014-08-31	2014-09-01	60	0				1.60271	0.909552	0.0993336	1.38292	2.71456	1.15438	0.396195	0	0	0.339861	0.899603	0.0423748	0.101434	0	0
M-70	2014-08-31	2014-09-01	70	0				1.29797	0.6972	0.0660983	0.990632	2.79481	0.833874	0.468844	0	0	0.27573	0.909839	0.0304188	0.093669	0	0
M-80	2014-08-31	2014-09-01	80	0				1.54259	0.601301	0.0484315	0.954191	3.23794	0.591103	0.57538	0	0	0.314164	1.41863	0	0.110351	0	0
N-0	2014-09-29	2014-10-01	0	7.08	23.82	372	8.78	0.144567	0.0518766	0.00651255	0.0403359	0.108757	0.0189281	0.0437329	0.00186486	0.00328178	0.00559351	0.0226246	0	0.00339073	0	0
N-10	2014-09-29	2014-10-01	10	7.05	23.29	372	8.73	0.0716627	0.0290749	0	0.029094	0.0690366	0	0.0405631	0	0	0	0.0213707	0	0	0	0
N-25	2014-09-29	2014-10-01	25	4.1	22.815	378	8.355	0.225597	0.0570491	0	0.0547224	0.277872	0.0302637	0.0548066	0	0	0	0.0488207	0	0	0	0
N-35	2014-09-29	2014-10-01	35	3.25	22.76	373.25	8.22	0.395359	0.0797225	0.00889405	0.0842129	0.447517	0.045269	0.0568144	0	0	0.0126082	0.0849283	0.00255627	0.0070671	0	0
N-50	2014-09-29	2014-10-01	50	0	22.55	393	7.5	0.424458	0.129109	0	0.0934119	0.386512	0	0.0829669	0	0	0	0.0869196	0	0	0	0
N-60	2014-09-29	2014-10-01	60	0				0.435139	0.154699	0.0354337	0.255426	0.630442	0.144498	0.11795	0	0	0.0595504	0.151812	0.00596158	0.0207124	0	0
N-70	2014-09-29	2014-10-01	70	0				1.47033	0.51952	0.0403126	0.797315	3.42018	0.424695	0.558106	0	0	0.199953	0.842564	0.0166194	0.0706536	0	0
N-80	2014-09-29	2014-10-01	80	0				0.286547	0.083511	0	0.0974255	0.354171	0	0.0670899	0	0	0	0.0934225	0	0	0	0
O-0	2014-10-31	2014-11-01	0	6.82	25.82	370	NA	0.302818	0.0822885	0.0107548	0.0516178	0.325817	0.0162602	0.0789748	0	0.00591953	0.00906387	0.0790663	0	0.00594785	0	0
O-10	2014-10-31	2014-11-01	10	6.81	25.16	366	NA	0.0768851	0.0324544	0	0	0.0927581	0	0.0293617	0	0	0	0	0	0	0	0
O-25	2014-10-31	2014-11-01	25	3.335	22.855	373	NA	0.238077	0	0	0	0.849556	0	0	0	0	0	0.328736	0	0	0	0
O-35	2014-10-31	2014-11-01	35	1.8	22.745	371.5	NA	1.75414	0.0592795	0.00638048	0	4.58448	0.0149572	0.0669757	0	0	0	1.71984	0.0101505	0.00498386	0	0
O-50	2014-10-31	2014-11-01	50	0	22.55	388	NA	0.172048	0	0	0.0458606	0.353203	0	0	0	0	0	0.15992	0	0	0	0
O-60	2014-10-31	2014-11-01	60	0				0.506695	0.0975528	0.0259883	0.173001	1.93357	0.101644	0.0622283	0	0	0.057694	0.733294	0.00825452	0.0120651	0	0
O-70	2014-10-31	2014-11-01	70	0				0.164507	0.0394986	0.0108219	0.016646	0.328053	0.0116482	0.0389174	0	0	0.00473569	0.104393	0	0	0	0
O-80	2014-10-31	2014-11-01	80	0				1.67137	0.511642	0	1.33684	3.15226	0.401589	0.572478	0	0	0.424549	1.30698	0	0.0923362	0	0
P-0	2014-12-04	2014-12-01	0	8.94	26.77	360	9.01	0.10882	0.0432176	0.00698622	0.0178513	0.113986	0.0091451	0.0379262	0	0.00304086	0.00343846	0.0276546	0	0.00240883	0	0
P-10	2014-12-04	2014-12-01	10	8.75	26.76	360	8.99	0.35453	0.0363423	0	0.0227018	1.00867	0	0.0324147	0	0	0	0.381284	0	0	0	0
P-25	2014-12-04	2014-12-01	25	3.42	22.985	372	8.33	0.533027	0.0366341	0	0	1.69128	0	0.0344304	0	0	0	0.544813	0	0	0	0
P-35	2014-12-04	2014-12-01	35	0.115	22.735	370.75	7.87	1.38566	0.0499715	0.00401729	0	4.38023	0.00702049	0.131155	0	0	0	1.9008	0.00901031	0.00788819	0	0
P-50	2014-12-04	2014-12-01	50	0	22.56	392	7.63	0.556748	0	0	0.171044	1.3591	0	0	0	0	0	0.679111	0	0	0	0
P-60	2014-12-04	2014-12-01	60	0				0.990112	0.33563	0.0361792	0.806831	2.31123	0.33792	0.308614	0	0	0.2568	0.897874	0.00321998	0.0390087	0	0
P-70	2014-12-04	2014-12-01	70	0				1.9948	0.574839	0.0381814	1.40296	4.81386	0.434843	0.73137	0	0	0.345093	1.42716	0.0224078	0.096868	0	0
P-80	2014-12-04	2014-12-01	80	0				1.68332	0.401087	0	0.997467	3.65904	0.293204	0.506293	0	0	0.362629	1.57715	0	0.0799354	0	0
Q-0	2015-01-05	2015-01-01	0	5.66	27.93	361	9.01	0.390368	0.112889	0.0114613	0.0486049	0.518959	0.0255781	0.114422	0.00180497	0.00566419	0.0132425	0.101971	0	0.00614365	0	0
Q-10	2015-01-05	2015-01-01	10	5.13	26.39	357	9.03	0.14951	0.0503223	0	0.0242719	0.206221	0	0.0440987	0	0	0	0.0589877	0	0	0	0
Q-25	2015-01-05	2015-01-01	25	1.925	23.19	374	8.23	0.929769	0.114872	0	0	3.52908	0.0406095	0.235374	0	0	0	1.4298	0	0	0	0
Q-35	2015-01-05	2015-01-01	35	0	22.75	372	7.9	1.06661	0.335241	0.0232027	0.751025	2.22496	0.463896	0.210961	0	0	0.223978	0.732263	0.0351377	0.0225007	0	0
Q-50	2015-01-05	2015-01-01	50	0	22.57	391	7.6	0.620942	0.235022	0	0.525187	1.23971	0.241624	0.153929	0	0	0.220122	0.58401	0	0	0	0
Q-60	2015-01-05	2015-01-01	60	0				1.20391	0.364948	0.0414874	0.846539	2.71262	0.315173	0.387045	0	0	0.280353	0.886032	0.0167882	0.0472049	0	0
Q-70	2015-01-05	2015-01-01	70	0				1.03197	0.321926	0.0265949	0.78634	2.69656	0.30069	0.38899	0	0	0.291534	0.930421	0.0212371	0.0488755	0	0
Q-80	2015-01-05	2015-01-01	80	0				1.78054	0.447675	0	1.02929	4.40078	0	0.566796	0	0	0	1.92191	0	0	0	0

## Sheet: S.2 brGDGTs sediment trap
		S2				S2: brGDGT flux in settling particles (ng m-2 day-1)
Month	Day of deployment	Day of collection	Median day deployment	days collecting	Bulk flux (mg m-2 day-1)	Ia	Ib	Ic	IIa	IIa'	IIb	IIb'	IIc	IIc'	IIIa	IIIa'	IIIb	IIIb'	IIIc	IIIc'		IR		sum 6me	5me	tetra
2010-09-01	2010-08-31	2010-10-03	2010-09-16 12:00:00	33	2693.4	156.296	51.3674	5.11546	11.0958	356.269	0	120.082	0	1.79306	3.05301	93.3527	0	5.87765	0	0		0.976081		577.374	14.1489	212.779
2010-10-01	2010-10-03	2010-10-31	2010-10-17	28	726.729	52.2335	9.77433	1.786	5.78735	104.731	2.20513	9.26127	0.312414	0.788811	1.12061	33.5957	0	0.484628	0	0		0.940453		148.862	9.42551	63.7938
2010-11-01	2010-10-31	2010-11-30	2010-11-15	30	2446.86	20.8333	2.07245	0.482543	1.26889	82.3992	0.611601	1.71794	0	0	0	38.5039	0	0	0	0		0.984896		122.621	1.88049	23.3883
2010-12-01	2010-11-30	2010-12-31	2010-12-15 12:00:00	31	1446.64	204.106	17.446	3.39241	5.64191	701.312	4.24315	13.2578	0.434295	1.4108	2.50855	278.285	1.74703	0.590682	0	0		0.985561		994.856	14.5749	224.945
2011-01-01	2010-12-31	2011-01-31	2011-01-15 12:00:00	31	1237.28	407.857	55.0424	13.005	39.3236	973.646	14.3421	60.5614	2.0802	5.43201	9.36722	450.946	2.97419	5.33114	0	1.39172		0.956505		1497.31	68.0873	475.905
2011-02-01	2011-01-31	2011-02-28	2011-02-14	28	600.689	84.8572	20.127	2.63968	8.3605	213.59	17.0987	18.6891	0.746371	1.00668	2.67312	92.4426	1.15822	1.12995	0	0		0.915838		326.858	30.0369	107.624
2011-03-01	2011-02-28	2011-03-31	2011-03-15 12:00:00	31	473.142	516.412	229.4	26.3311	56.5796	1333.76	183.532	257.57	7.14529	7.24556	16.074	519.405	7.06949	12.5222	0	1.2733		0.887435		2131.77	270.4	772.143
2011-04-01	2011-03-31	2011-04-30	2011-04-15	30	346.6	125.959	38.6379	4.98151	20.3446	181.975	24.2169	45.8204	1.52101	0.990609	3.24835	70.3082	0.990174	2.23669	0	0		0.856901		301.331	50.321	169.579
2011-05-01	2011-04-30	2011-05-31	2011-05-15 12:00:00	31	295.991	14.6544	6.37224	0.707584	2.92734	30.2452	4.94111	8.78928	0	0	0.823791	14.1634	0	0.475971	0	0		0.860626		53.6738	8.69224	21.7342
2011-06-01	2011-05-31	2011-06-30	2011-06-15	30	352.339	104.539	58.1157	7.82657	35.7291	153.365	35.436	50.9219	1.74927	3.0026	7.23164	58.9875	1.0028	2.33133	0	0		0.767985		268.608	81.1488	170.481
2011-07-01	2011-06-30	2011-07-31	2011-07-15 12:00:00	31	412.055	160.451	53.507	4.89258	17.9277	207.786	19.7883	61.4294	0.958508	2.79999	4.43665	58.5898	0.692728	2.5614	0	0.427729		0.883932		333.595	43.8039	218.85
2011-08-01	2011-07-31	2011-08-30	2011-08-15	30	537.689	159.398	51.0632	6.09906	26.9883	227.109	17.6599	80.4997	1.07125	3.45499	4.73264	73.8119	0.85758	5.28235	0	0.764352		0.883976		390.923	51.3097	216.56
2011-09-01	2011-08-30	2011-09-29	2011-09-14	30	530.803	123.418	20.2389	3.27413	14.7274	103.212	3.11023	41.365	0.631894	1.32777	2.28616	39.7379	0	3.50963	0	0.488633		0.901349		189.641	20.7557	146.931
2011-10-01	2011-09-29	2011-10-30	2011-10-14 12:00:00	31	317.094	96.6092	21.3644	2.69379	8.7329	108.122	3.42239	40.0839	0.454852	1.50883	1.29094	35.5478	0	2.76713	0	0.434145		0.931307		188.463	13.9011	120.667
2011-11-01	2011-10-30	2011-11-30	2011-11-14 12:00:00	31	1732.08	173.848	124.976	19.9033	12.18	242.364	9.20547	242.51	0	26.6073	3.33162	130.866	0	27.8675	0	7.4994		0.964812		677.714	24.7171	318.728
2011-12-01	2011-11-30	2011-12-29	2011-12-14 12:00:00	29	804.961	67.7365	49.4698	7.97356	7.3658	90.4317	3.49292	93.0148	0	8.84608	1.68322	35.8993	0	8.64212	0	2.25517		0.950157		239.089	12.5419	125.18
2012-01-01	2011-12-29	2012-01-30	2012-01-14	32	837.091	257.071	93.6635	10.6734	28.8179	572.809	9.48585	160.986	0.719458	11.2973	10.8271	241.916	1.47773	13.1681	0	2.87521		0.951319		1003.05	51.328	361.408
2012-02-01	2012-01-30	2012-02-29	2012-02-14	30	1063.33	277.543	105.103	13.9468	24.7985	587.395	14.8832	176.441	1.23311	13.8426	9.27473	244.873	1.94299	15.7843	0	4.03074		0.952369		1042.37	52.1325	396.593
2012-03-01	2012-02-29	2012-03-30	2012-03-15	30	385.621	137.811	43.4143	5.15821	21.0872	245.863	11.3759	52.6068	0.548409	4.93905	5.84975	95.7436	1.03736	6.94744	0	1.87864		0.910916		407.978	39.8986	186.384
2012-04-01	2012-03-30	2012-05-22	2012-04-25 12:00:00	53	802.295	481.069	111.82	14.304	94.8354	872.716	40.7102	113.596	1.81898	6.21237	25.4122	332.748	2.6981	7.2213	0	1.3407		0.889633		1333.83	165.475	607.193
2012-05-01	2012-05-22	2012-05-31	2012-05-26 12:00:00	9	891.367	118.412	72.325	10.5814	7.87414	215.166	7.95181	160.628	0	13.2565	1.63095	107.88	1.28177	19.3954	0	4.73432		0.965286		521.06	18.7387	201.318
2012-06-01	2012-05-31	2012-06-30	2012-06-15	30	405.706	181.712	156.263	30.2124	3.62367	174.915	1.45432	182.591	0	19.225	0.908951	50.4725	0.308756	9.2805	0	2.87718		0.985873		439.361	6.29569	368.187
2012-07-01	2012-06-30	2012-07-31	2012-07-15 12:00:00	31	378.18	122.118	94.4533	30.847	5.5651	136.573	3.89095	104.793	0.318715	8.0378	1.05632	41.1697	0.433772	6.04332	0	1.3815		0.963575		297.998	11.2649	247.418
2012-08-01	2012-07-31	2012-08-31	2012-08-15 12:00:00	31	868.537	241.259	100.458	9.54625	29.4998	193.99	19.3028	99.9171	0.725361	6.7474	4.92875	50.7803	0.706348	7.07582	0	1.19514		0.867035		359.706	55.1631	351.263
2012-09-01	2012-08-31	2012-09-30	2012-09-15	30	659.344	199.883	104.969	19.0658	3.43009	501.524	1.35121	107.79	0	11.9851	0.665297	184.306	1.03281	6.13818	0	1.94068		0.9921		813.683	6.47941	323.918
2012-10-01	2012-09-30	2012-10-30	2012-10-15	30	736.239	142.931	50.6571	7.56904	4.1921	418.36	2.12243	55.5771	0	5.73628	0.895144	152.497	0.815182	3.53047	0	1.13485		0.987556		636.835	8.02485	201.157
2012-11-01	2012-10-30	2012-12-17	2012-11-23	48	729.855	513.398	118.99	23.6131	11.4474	1763.37	7.52518	119.936	0.425553	15.4017	2.53754	710.502	3.77509	6.79615	0	3.23195		0.990279		2619.23	25.7108	656.001
2012-12-01	2012-12-17	2012-12-30	2012-12-23 12:00:00	13	1019.67	207.68	88.8414	19.3357	2.65712	595.376	1.95003	106.955	0	13.5587	0	248.522	1.42439	9.85229	0	2.95627		0.993866		977.22	6.03154	315.857
2013-01-01	2012-12-30	2013-01-31	2013-01-15	32	482.027	239.499	67.963	16.2272	7.58825	577.21	8.39229	136.071	0.484509	15.2284	2.28	201.762	1.14641	11.6761	0	2.20706		0.979367		944.154	19.8915	323.689
2013-02-01	2013-01-31	2013-02-27	2013-02-13 12:00:00	27	525.384	30.3861	8.19769	1.30706	0.9748	65.4684	0.651858	16.9169	0	1.62282	0	24.2262	0	1.8049	0	0.366057		0.98548		110.405	1.62666	39.8908
2013-03-01	2013-02-27	2013-03-30	2013-03-14 12:00:00	31	516.457	229.693	50.2687	7.16464	7.22953	558.905	9.72036	85.7356	0.463818	6.95879	2.13499	191.455	0.99655	11.3737	0	2.52066		0.976586		856.949	20.5453	287.126
2013-04-01	2013-03-30	2013-04-30	2013-04-14 12:00:00	31	460.924	687.349	211.683	15.0913	90.4756	1148.84	51.556	310.666	2.15249	10.9055	17.7703	417.619	1.83892	18.728	0	2.39098		0.920985		1909.15	163.793	914.123
2013-05-01	2013-04-30	2013-05-30	2013-05-15	30	445.875	733.166	198.976	13.5803	94.5699	1502.6	65.4653	260.583	2.21174	7.22996	15.0885	556.079	4.92863	12.2021	0	0		0.927701		2338.7	182.264	945.723
2013-06-01	2013-05-30	2013-07-06	2013-06-17 12:00:00	37	307.548	221.25	80.575	7.53535	12.1453	366.837	10.5534	147.31	0.677367	9.71956	2.73242	127.839	0.969409	10.0437	0	1.50061		0.960775		663.25	27.0779	309.36
2013-07-01	2013-07-06	2013-07-31	2013-07-18 12:00:00	25	377.358	242.336	91.9556	9.53742	13.5796	383.639	17.0737	162.801	0.82992	10.1992	3.11139	133.406	1.18187	11.6633	0	1.44023		0.951583		703.148	35.7765	343.829
2013-08-01	2013-07-31	2013-08-31	2013-08-15 12:00:00	31	716.932	974.254	372.809	27.904	190.926	1591.54	114.964	531.157	4.02221	20.382	44.3892	491.538	6.38103	41.294	0	3.01974		0.881339		2678.93	360.683	1374.97
2013-09-01	2013-08-31	2013-10-01	2013-09-15 12:00:00	31	1571.03	97.7023	37.4766	2.83784	26.6499	170.77	13.2955	41.2	0.80084	1.1879	6.62352	49.3436	0	4.75069	0	0		0.849439		267.252	47.3698	138.017
2013-10-01	2013-10-01	2013-11-01	2013-10-16 12:00:00	31	559.773	45.7796	17.0685	2.41407	11.7488	52.3463	6.17535	14.4985	0.389942	0.982043	2.30005	14.4401	0	1.12453	0	0		0.801798		83.3915	20.6142	65.2622
2013-11-01	2013-11-01	2013-11-30	2013-11-15 12:00:00	29	411.385	324.523	174.218	21.056	70.3265	568.328	214.737	50.529	7.50266	2.45745	13.7561	160.142	6.13012	4.1385	0.458714	0.497662		0.715277		786.093	312.911	519.797
2013-12-01	2013-11-30	2014-01-06	2013-12-18 12:00:00	37	1091.07	281.19	198.131	20.9189	87.191	451.944	225.882	37.6702	7.12562	1.31823	13.7243	119.867	6.10837	2.7646	0	0		0.643422		613.565	340.031	500.24
2014-01-01	2014-01-06	2014-01-29	2014-01-17 12:00:00	23	407.926	232.258	165.662	19.7108	74.1094	323.483	208.086	32.8689	7.32758	1.81918	12.7269	80.5866	5.97507	2.86613	0	0.403689		0.589172		442.027	308.225	417.631
2014-02-01	2014-01-29	2014-03-05	2014-02-15 12:00:00	35	362.996	145.591	108.334	11.4994	49.1386	172.494	128.311	22.4845	4.0828	0.828359	7.6196	48.9664	3.51151	2.04623	0	0		0.561613		246.819	192.664	265.424
2014-03-01	2014-03-05	2014-04-04	2014-03-20	30	133.705	237.954	257.648	30.1253	108.677	285.441	342.794	42.867	11.791	1.95867	19.2446	70.9338	9.73591	5.08502	0.633709	0.428472		0.45211		406.714	492.877	525.728
2014-04-01	2014-04-04	2014-04-29	2014-04-16 12:00:00	25	327.09	145.745	102.184	9.60933	62.3942	216.268	104.993	48.4306	13.1531	14.1269	14.828	47.8851	0	0	0	0		0.625787		326.71	195.368	257.538
2014-05-01	2014-04-29	2014-06-01	2014-05-15 12:00:00	33	212.843	165.283	85.5688	8.73534	43.2623	285.541	89.4467	35.5562	3.13188	1.05952	8.53318	87.6019	3.12939	7.81474	0	0		0.738968		417.574	147.503	259.587
2014-06-01	2014-06-01	2014-06-30	2014-06-15 12:00:00	29	252.886	50.1763	38.581	4.02842	30.0212	60.7491	36.8702	20.6443	1.33308	0.916042	5.73767	17.774	1.28393	3.74111	0	0		0.579797		103.825	75.2461	92.7857
2014-07-01	2014-06-30	2014-07-31	2014-07-15 12:00:00	31	632.521	95.7597	75.2808	7.61136	67.9231	120.195	68.514	52.134	2.40485	2.46438	13.8408	43.7148	2.63915	13.4355	0	0.741124		0.599693		232.685	155.322	178.652
2014-08-01	2014-07-31	2014-09-02	2014-08-16 12:00:00	33	1800.82	72.2005	44.1981	4.19386	62.4622	82.19	34.5946	32.5192	1.25265	1.68292	11.6239	25.4562	1.44096	4.72833	0	0		0.568235		146.577	111.374	120.592
2014-09-01	2014-09-02	2014-09-29	2014-09-15 12:00:00	27	2660.07	208.773	94.0718	5.8702	64.7999	229.906	22.7403	95.9947	0	3.32027	10.8419	56.7894	1.26654	4.41936	0	0		0.796668		390.43	99.6488	308.715
2014-10-01	2014-09-29	2014-10-29	2014-10-14	30	1063.9	154.891	29.4667	4.07568	16.3359	518.254	11.5146	27.8696	0.729431	2.06865	3.63778	244.803	1.33742	1.88304	0	0.467523		0.959519		795.346	33.5551	188.433
2014-11-01	2014-10-29	2014-12-12	2014-11-20	44	1014.92	535.074	27.0189	3.73826	0	3156.62	8.63334	38.9277	0	2.01717	2.64112	1482.16	8.62155	2.85211	0	0		0.995769		4682.58	19.896	565.831
2014-12-01	2014-12-12	2015-01-04	2014-12-23 12:00:00	23	867.499	378.459	29.1509	4.06617	7.36195	1577.53	6.49443	49.3047	0.697751	1.89171	2.2815	631.781	3.48012	2.33675	0	0		0.991102		2262.84	20.3157	411.676
2015-01-01	2015-01-04	2015-01-31	2015-01-17 12:00:00	27	1101.78	611.276	85.3649	11.7769	36.2061	1559.65	28.5885	133.877	2.68935	2.87134	7.47073	622.447	3.9376	6.38049	0	0.607141		0.967193		2325.84	78.8923	708.418
																						0.995769
																						0.45211

## Sheet: S.3 brGDGTs soil
S3								fractional abundance brGDGTs in soils
	UTM coordinates
Soil code	Easting	Northing	Colour	Depth interval (cm)	Origin	Cluster	%Corg	Ia	Ib	Ic	IIa	IIa'	IIb	IIb'	IIc	IIc'	IIIa	IIIa'	IIIb	IIIb'	IIIc	IIIc'
LB85	348304	9635591	red	0-8	H	1	1.1	0.616207	0.134191	0.0305721	0.052476	0.111545	0.0273719	0.0149327	0	0	0	0.0127047	0	0	0	0
LB80	354312	9634167	red	0-6	LR	2	1.7	0.417827	0.209772	0.0374725	0.0871149	0.123854	0.0385273	0.0398923	0.00290486	0.00304984	0.0124991	0.0238937	0.00161693	0.00157585	0	0
LB74	354990	9632000	grey	0-6	C	3	1.3	0.394152	0.146178	0.0254307	0.0482887	0.281107	0	0.0527916	0	0	0.0103458	0.0417065	0	0	0	0
J1	356950	9633581	grey	0-3	L	4	5.4	0.345888	0.130058	0.01066	0.0421246	0.300879	0	0.0876079	0	0.00467939	0.0105911	0.0622702	0	0.00524076	0	0
J3	356937	9633555	grey	0-6	CL	4	24.7	0.377461	0.0943153	0.011094	0.0932472	0.25906	0	0.0733799	0	0.00372668	0.00728862	0.075831	0	0.00459622	0	0
J9	354074	9634752	red	0-10	RH	2	3	0.3597	0.151149	0.0171178	0.159619	0.158984	0.0403685	0.0430142	0.00154808	0.00352119	0.0248952	0.0356353	0.00156814	0.00287933	0	0
J11	354373	9634504	red	n.d.	RH	1	1.2	0.766273	0.0650375	0.0129766	0.0327404	0.109815	0	0.00479197	0	0	0	0.00836589	0	0	0	0
Soil information and description from Buckles et al. (2014)
n.d. = not determined
Soil origin codes:
C	Crater rim
H	Hinterland
L	Lake shore
R	Ravine

## Sheet: S.4 brGDGTs sediment
S4					fractional abundance brGDGTs in sediments
			UTM coordinates
Core code	Depth interval (cm)	Water depth (m)	Easting	Northing	Ia	Ib	Ic	IIa	IIa'	IIb	IIb'	IIc	IIc'	IIIa	IIIa'	IIIb	IIIb'	IIIc	IIIc'
CH10-06G	2 - 5	91.6	355347	9633219	0.309926	0.0800132	0.00755038	0.129327	0.269558	0.0462002	0.0316026	0.00206327	0.00143643	0.030904	0.0871359	0.00221149	0.00207126	0	0
CH10-09G	2 - 5	75	354548	9633854	0.315095	0.0803544	0.00958992	0.118317	0.271651	0.0452337	0.039523	0.0023229	0.00201065	0.0284532	0.0831071	0.00204842	0.0022932	0	0
CH10-10G	2 - 5	64.7	354494	9634091	0.294859	0.0979851	0.0146715	0.0971011	0.265271	0.0487562	0.0520072	0.00407044	0.00449851	0.0268288	0.0869304	0.00285564	0.0041657	0	0

## Sheet: S.5 16S rRNA L3
S5: 16S rRNA gene copies fractional abundance (%)
code (month/year/depth (m))	sep13_0	sep13_10	sep13_20	sep13_25	sep13_30	sep13_35	sep13_40	sep13_45	sep13_50	sep13_60	sep13_70	sep13_80	sep13_90	oct13_0	oct13_10	oct13_20	oct13_25	oct13_30	oct13_35	oct13_40	oct13_45	oct13_50	oct13_60	oct13_70	oct13_80	oct13_90	nov13_0	nov13_10	nov13_20	nov13_25	nov13_30	nov13_35	nov13_40	nov13_45	nov13_50	nov13_60	nov13_70	nov13_80	nov13_90	dec13_0	dec13_10	dec13_20	dec13_25	dec13_30	dec13_35	dec13_40	dec13_45	dec13_50	dec13_60
total 16S rRNA gene copies/L	8.14622e+07	1.56109e+07	1.17703e+07	1.0007e+07	4.02768e+07	1.16797e+08	5.71875e+07	3.01713e+07	8.66444e+07	3.78679e+07	3.13697e+07	2.09074e+07	1.11023e+07	5.44698e+07	1.64965e+07	3.14717e+07	4.25618e+07	8.04114e+07	1.80075e+07	4.95839e+06	1.84214e+07	3.50299e+07	2.59584e+07	1.80661e+07	7.8605e+07	1.13574e+07	5.05514e+07	4.4451e+06	2.35753e+07	1.22776e+07	3.91173e+07	5.57216e+07	1.9575e+06	3.92869e+07	7.93003e+06	3.04995e+07	6.66847e+07	1.7508e+07	1.73947e+07	3.87801e+07	1.59352e+07	2.3987e+07	8.50652e+07	4.31647e+07	3.64607e+07	1.75649e+07	2.33975e+07	1.80856e+07	1.34602e+07
#OTU ID	NIOZ66.1	NIOZ66.2	NIOZ66.3	NIOZ66.4	NIOZ66.5	NIOZ66.6	NIOZ66.7	NIOZ66.8	NIOZ66.9	NIOZ66.10	NIOZ66.11	NIOZ66.12	NIOZ66.13	NIOZ66.14	NIOZ66.15	NIOZ66.16	NIOZ66.17	NIOZ66.18	NIOZ66.19	NIOZ66.20	NIOZ66.21	NIOZ66.22	NIOZ66.23	NIOZ66.24	NIOZ66.25	NIOZ66.26	NIOZ66.27	NIOZ66.28	NIOZ66.29	NIOZ66.30	NIOZ66.31	NIOZ66.32	NIOZ66.33	NIOZ66.34	NIOZ66.35	NIOZ66.36	NIOZ66.37	NIOZ66.38	NIOZ66.39	NIOZ66.40	NIOZ66.41	NIOZ66.42	NIOZ66.43	NIOZ66.44	NIOZ66.45	NIOZ66.46	NIOZ66.47	NIOZ66.48	NIOZ66.49
D_0__Bacteria;D_1__Acidobacteria;D_2__Acidobacteria	0	0	0	0	0	0	0	0	0	0	0	0	0	0	0	0	0	0	0	0	0	0	0	0	0	0	0	0	0	0	0	0	0	0	0	0	0	0	0	0	0	0	0	0	0	0	0	0	0
D_0__Bacteria;D_1__Acidobacteria;D_2__Blastocatellia	0.0079583	0.00402974	0.0111119	0.00907594	0.009567	0.0175862	0.0066107	0.00311814	0.00410408	0.0124259	0.00572639	0.0338573	0.0107145	0.00879417	0.01329	0.00550122	0.00520078	0.0049985	0.0120594	0.0064534	0.00718465	0.00828938	0.0102669	0.0290036	0.0229095	0.0159258	0.0248431	0.00273381	0.00582471	0.00844381	0.00568429	0.0438824	0.00308285	0.00764558	0.0237969	0.0122474	0.00868821	0.00939055	0.00666667	0.00296754	0.00549783	0.0151842	0.0101387	0.00894449	0.0536235	0.00558803	0.0104089	0.0256418	0.706714
D_0__Bacteria;D_1__Acidobacteria;D_2__Holophagae	0.0870439	0	0.00462997	0	0.0009567	0.00639499	0	0.00124726	0	0.00443782	0.0028632	0.00725514	0.00164838	0	0.0006645	0	0	0	0.00172277	0	0	0.00103617	0	0	0	0	0	0	0	0	0.00189476	0	0	0	0.0026441	0	0	0	0	0	0	0	0.000779903	0	0	0	0	0	0
D_0__Bacteria;D_1__Acidobacteria;D_2__Solibacteres	0.000497394	0	0	0	0	0	0	0	0	0.000887563	0.0028632	0	0	0	0	0	0	0	0	0.00276574	0	0	0	0	0	0	0	0	0	0.000649524	0	0	0	0	0	0	0	0	0	0	0	0	0.000779903	0.0023852	0.00682481	0	0.00260222	0.00284908	0.00689477
D_0__Bacteria;D_1__Acidobacteria;D_2__Subgroup 11	0	0	0	0	0	0	0	0	0	0	0	0	0	0	0	0	0	0	0	0	0	0	0	0	0	0	0	0	0	0	0	0	0	0	0	0	0	0	0	0	0	0	0	0	0	0	0	0	0
D_0__Bacteria;D_1__Acidobacteria;D_2__Subgroup 13	0	0	0	0	0	0	0	0	0	0	0	0	0	0	0	0	0	0	0	0	0	0	0	0	0	0	0	0	0	0	0	0	0	0	0	0	0	0	0	0	0	0	0	0	0	0	0	0	0
D_0__Bacteria;D_1__Acidobacteria;D_2__Subgroup 17	0	0	0	0	0	0	0	0	0	0	0	0.00241838	0	0	0	0	0	0	0	0	0	0	0	0	0	0	0	0.00273381	0	0	0	0	0	0	0	0	0	0	0	0	0	0	0	0	0	0	0	0	0
D_0__Bacteria;D_1__Acidobacteria;D_2__Subgroup 18	0	0	0	0	0	0	0	0	0	0.000887563	0.000954399	0.00483676	0.00247258	0	0.0019935	0	0	0	0.000861386	0.0064534	0	0	0	0.00152651	0	0	0.0016562	0	0	0	0	0	0.00770713	0	0.0026441	0	0	0	0.00111111	0	0	0	0	0	0.000649982	0	0.00455388	0	0.00861846
D_0__Bacteria;D_1__Acidobacteria;D_2__Subgroup 19	0	0	0	0	0	0	0	0	0	0	0	0.00241838	0.000824192	0	0	0	0	0	0	0	0	0	0	0.00152651	0	0	0	0	0	0	0	0	0.00462428	0	0	0	0	0	0	0	0	0	0	0	0.000649982	0	0.00260222	0	0.00258554
D_0__Bacteria;D_1__Acidobacteria;D_2__Subgroup 2	0	0	0	0.00194484	0.0066969	0	0	0.00187088	0	0.00266269	0	0	0	0	0	0	0	0	0	0	0	0	0	0	0	0	0	0	0	0	0	0	0	0	0	0	0	0	0	0	0	0	0	0.000596299	0.000324991	0	0	0	0.00172369
D_0__Bacteria;D_1__Acidobacteria;D_2__Subgroup 21	0.0114401	0.0141041	0.0138899	0.0136139	0.0133938	0.01279	0.0264428	0.0162143	0.0164163	0.0177513	0.0133616	0.0580411	0.0239016	0.0185655	0.017277	0.0154034	0.0149523	0.0183278	0.0137822	0.15396	0.0215539	0.0207235	0.036961	0.0228976	0.030546	0.0336212	0.0231869	0.0109352	0.0291235	0.0103924	0.0151581	0.0438824	0.581118	0.0144417	0.0317292	0.0142886	0.0173764	0.0187811	0.0111111	0.0103864	0.0153939	0.00911051	0.0132584	0.00834819	0.155346	0.252579	1.95101	0.618251	1.88486
D_0__Bacteria;D_1__Acidobacteria;D_2__Subgroup 6	0.00149218	0.00402974	0	0.00194484	0.0028701	0	0.0066107	0.00810716	0.00246245	0.00532538	0.00477199	0.00725514	0.00329677	0.0014657	0.002658	0	0.00260039	0.0049985	0.00344554	0.00184383	0.00205276	0.00414469	0.00821355	0.00152651	0.005091	0.00176954	0.00331241	0.00273381	0.00291235	0.00129905	0.0113686	0.00797862	0.00308285	0.000849509	0.0026441	0.00204123	0	0	0.00333333	0.000741884	0.00769696	0.00303684	0.00155981	0.0017889	0.00682481	0.0100585	0.0299255	0.0113963	0.0723951
D_0__Bacteria;D_1__Acidobacteria;D_2__Subgroup 9	0	0	0	0	0	0	0	0	0	0	0	0	0	0	0	0	0	0	0	0	0	0	0	0	0	0	0	0	0	0	0	0	0	0	0	0	0	0	0	0	0	0	0	0	0	0	0	0	0
D_0__Bacteria;D_1__Acidobacteria;D_2__c5LKS83	0	0	0	0	0	0	0	0	0	0	0	0	0	0	0	0	0	0	0	0	0	0	0	0	0	0	0	0	0	0	0	0	0	0	0	0	0	0	0	0	0	0	0	0	0	0	0	0	0
D_0__Bacteria;D_1__Acidobacteria;D_2__uncultured bacterium	0	0	0	0	0	0	0	0	0	0	0	0	0.000824192	0	0	0	0	0	0	0	0	0	0	0	0	0	0	0	0	0	0	0	0	0	0	0	0	0	0	0	0	0	0	0	0	0	0	0	0
D_0__Bacteria;D_1__Acidobacteria;Other	0	0	0	0	0	0	0	0	0	0	0	0	0	0	0	0	0	0	0	0	0	0	0	0	0	0	0	0	0	0	0	0	0	0	0	0	0	0	0	0	0	0	0	0	0.000324991	0	0	0	0
D_0__Bacteria;D_1__AC1;D_2__uncultured soil bacterium	0	0	0	0	0	0	0	0	0	0	0	0	0	0	0	0	0	0	0	0	0	0	0	0	0	0	0	0	0	0	0	0	0	0	0	0	0	0	0	0	0	0	0	0	0	0	0	0	0.000861846
D_0__Bacteria;D_1__Actinobacteria;D_2__Coriobacteriia	0	0	0	0.00324141	0	0	0	0.000623628	0	0.000887563	0.0019088	0	0.000824192	0	0	0	0	0	0	0.00184383	0	0.00103617	0	0	0	0	0.0016562	0	0	0.000649524	0	0	0.00154143	0	0	0	0	0	0.00111111	0	0	0	0	0	0	0	0.00130111	0.00284908	0.00258554
D_0__Bacteria;D_1__Actinobacteria;D_2__OPB41	0.00547133	0.00805948	0.0101859	0.00648281	0.0105237	0.00479624	0.0198321	0.00498902	0.00410408	0.00443782	0.00477199	0.0677146	0.142585	0.00732848	0.005316	0.0121027	0.00325049	0.00333233	0.00516831	0.0949571	0.0102638	0.0113979	0.0123203	0.0213711	0.0127275	0.0353907	0.00993723	0.00546762	0.0218426	0.00389714	0.0606325	0.0598396	0.169557	0.0263348	0.0343733	0.0326597	0.0148941	0.0493004	0.00444444	0.00148377	0.00769696	0.0212579	0.00701913	0.00715559	0.0321741	0.160935	0.0897765	0.0541326	0.12152
D_0__Bacteria;D_1__Armatimonadetes;D_2__uncultured	0.00497394	0.00201487	0.00462997	0.00324141	0	0.00319749	0.0066107	0.00374177	0.00246245	0.00621294	0	0.0145103	0.0296709	0.00488565	0.0033225	0.00220049	0.0013002	0.00333233	0.00430693	0.0377985	0.00102638	0.00207235	0.00821355	0.00610603	0.0127275	0.00707814	0.0016562	0.00546762	0	0.00259809	0.00189476	0.0159572	0.0770713	0.000849509	0.0105764	0.00408247	0.00496469	0.00234764	0.00111111	0.00370942	0.00109957	0.00303684	0.00233971	0.0011926	0.00617483	0.191111	0.135315	0.0370381	0.145652
D_0__Bacteria;D_1__Armatimonadetes;D_2__uncultured bacterium	0	0	0	0	0	0	0	0	0	0	0	0	0.000824192	0	0	0	0	0	0	0	0	0	0	0	0	0	0	0	0	0	0	0	0	0	0	0	0	0	0	0	0	0	0	0	0	0	0	0	0
D_0__Bacteria;D_1__Chlamydiae;D_2__LD1-PA32	0	0	0	0	0	0	0	0	0	0	0	0	0.00412096	0	0	0	0	0	0	0	0	0	0	0	0	0	0	0	0	0	0	0	0	0	0	0	0.00124117	0	0	0	0	0	0	0	0	0	0	0	0
D_0__Bacteria;D_1__Hydrogenedentes;Other	0	0	0	0	0.0047835	0	0	0	0	0	0	0	0	0	0.0006645	0	0	0	0	0	0	0	0	0	0	0	0	0	0	0	0	0	0	0	0	0	0	0	0	0	0	0	0	0	0	0	0	0	0
D_0__Bacteria;D_1__Omnitrophica;D_2__uncultured bacterium	0.00149218	0.00402974	0.00555597	0.00194484	0.0019134	0.00319749	0	0.00311814	0.00246245	0.000887563	0.00954399	0.0798065	0.298357	0.0014657	0	0.00220049	0.000650098	0	0.00258416	0.0101411	0	0.00103617	0.00821355	0.00763254	0.010182	0.026543	0.00828102	0	0.00145618	0.00129905	0.00189476	0.0199465	0.0308285	0.00339804	0.0105764	0.0122474	0.00248234	0.0340408	0.00111111	0.000741884	0.00109957	0.00303684	0.000779903	0.000596299	0.00682481	0.00558803	0.00455388	0.0113963	0.0155132
D_0__Bacteria;D_1__PAUC34f;D_2__uncultured Deferribacteres bacterium	0	0	0	0	0	0	0	0	0	0	0	0	0	0	0	0	0	0	0	0	0	0	0	0	0	0	0	0	0	0	0	0	0	0	0	0	0	0	0	0	0	0	0	0	0	0	0	0	0
D_0__Bacteria;D_1__Planctomycetes;D_2__Pla4 lineage	0	0	0	0	0	0	0	0	0	0	0.000954399	0	0.000824192	0	0.0006645	0	0.000650098	0	0	0	0	0	0	0	0	0	0	0	0	0	0	0	0.0246628	0	0	0	0	0	0	0	0	0	0	0	0.000974972	0.00111761	0.00260222	0.00284908	0.00344738
D_0__Bacteria;D_1__Saccharibacteria;D_2__uncultured soil bacterium	0	0	0	0	0	0	0	0	0	0.000887563	0	0	0	0	0	0	0	0	0	0	0	0	0	0	0	0	0	0	0	0	0	0	0	0	0	0	0	0	0	0.000741884	0	0	0	0	0	0	0.000650555	0	0
D_0__Bacteria;D_1__TM6 (Dependentiae);D_2__Candidatus Babela massiliensis	0	0	0	0	0	0	0	0	0	0	0	0.00241838	0.000824192	0	0	0	0	0	0	0	0	0	0	0	0	0.00353907	0	0	0	0	0	0	0	0	0	0	0	0	0	0	0	0	0	0	0	0	0	0	0
[truncated: 171 more columns]
